# Supplementary material for: Full-length merozoite surface protein 1 of Plasmodium falciparum is a major target of protective immunity following controlled human malaria infections
Source: bioRxiv or medRxiv preprint supplement (doi:10.1101/2022.10.12.22280947), 2022-10-16
Supplement: Supplementary file [file media-1.pdf]

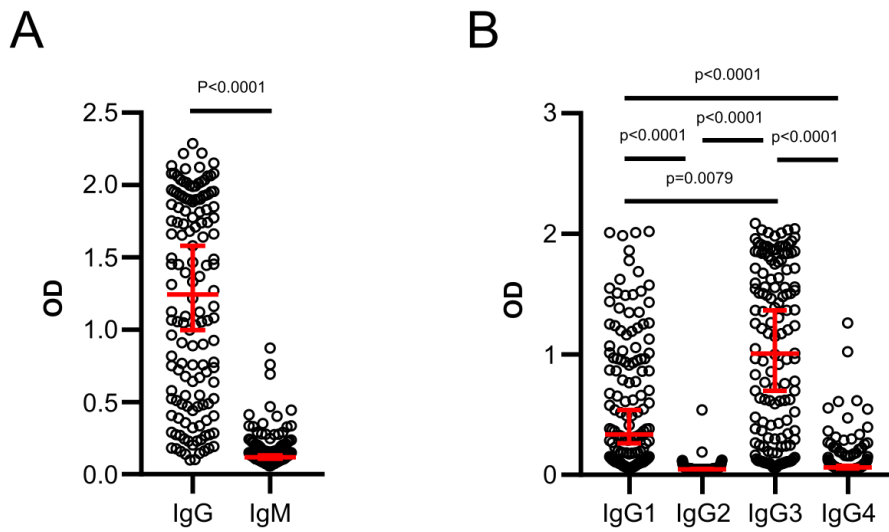

**Figure S1: The levels of IgG and cytophilic antibody responses are higher compared to IgM and non-cytophilic antibodies.**

(A) Comparison of IgG and IgM levels in CHMI volunteers (n=142). (B) Comparison of IgG subclass 1-4 antibody levels in CHMI volunteers. Each data point represents antibody levels for one sample in duplicates. Error bars represent the median plus 95% confidence intervals. Statistical differences between IgG and IgM were calculated using Mann-Whitney test and between subclass 1-4 antibodies using Kruskal Wallis test with Dunn's multiple comparisons test.

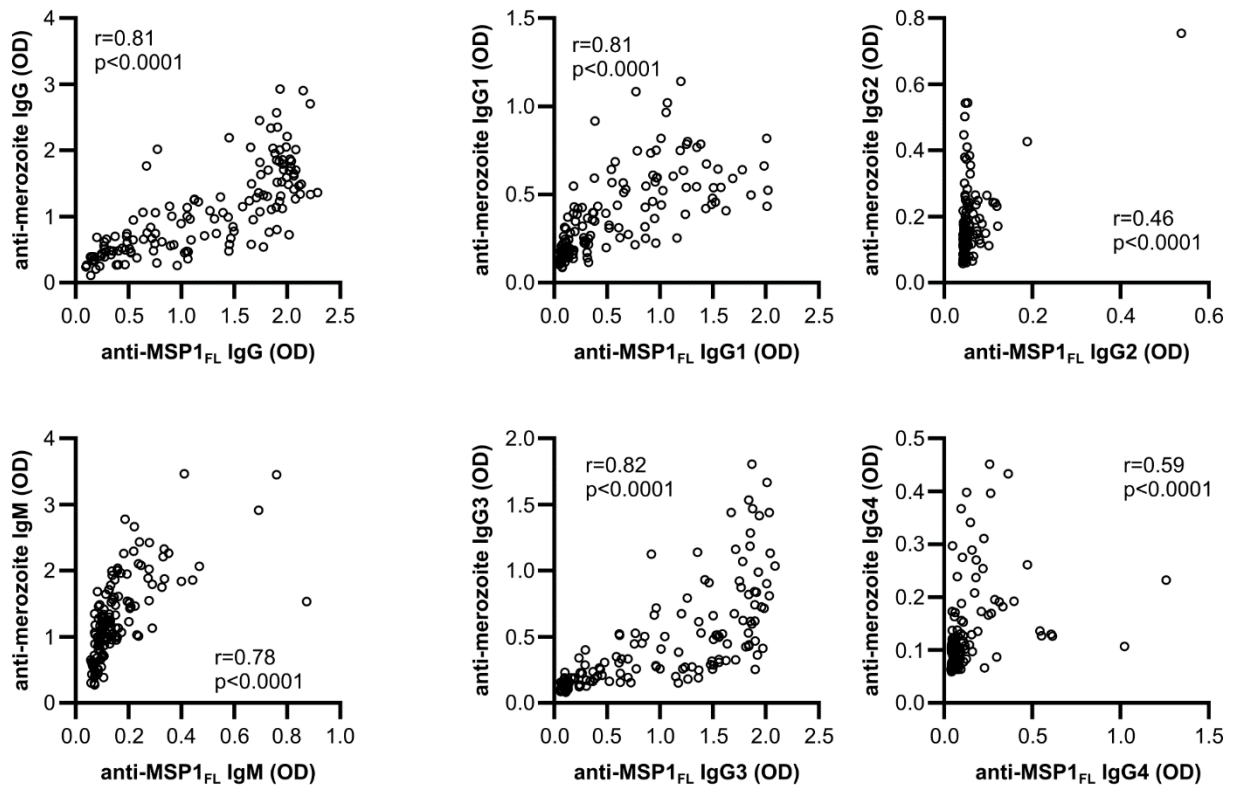

**Figure S2: Antibody responses against MSP1<sub>FL</sub> are correlated with responses against whole merozoites.**

Spearman's correlation of anti-MSP1<sub>FL</sub> and anti-merozoite IgG, IgM and IgG subclass 1-4 antibodies in CHMI volunteers (n=142). Each data point represents antibody levels for one sample in duplicates.
